# Supplementary material for: P-doped carbon dots act as a nanosensor for trace 2,4,6-trinitrophenol detection and a fluorescent reagent for biological imaging
Source: Royal Society of Chemistry journal article supplement (doi:10.1039/c5ra18800h), 2015-01-01
Supplement: c5ra18800h1.pdf [file c5ra18800h1.pdf]

**Electronic Supplementary Material**  
*For*  
**P-doped carbon dots act as nanosensor for trace 2,4,6-  
trinitrophenol detection and fluorescent reagent for  
biological imaging**

Dechao Shi <sup>a</sup>, Fanyong Yan <sup>a\*</sup>, Tancheng Zheng <sup>a</sup>, Yinyin Wang <sup>b</sup>, Xuguang Zhou <sup>a\*\*</sup>, Li Chen <sup>a</sup>

<sup>a</sup> *State Key Laboratory of Hollow Fiber Membrane Materials and Processes, Key Lab of Fiber Modification & Functional Fiber of Tianjin, Tianjin Polytechnic University, Tianjin 300387, PR. China*

<sup>b</sup> *TianJin Engineering Center for Safety Evaluation of Water Quality & Safeguards Technology, PR. China*

---

\* Corresponding author. Tel.: +86 22 83955766; fax: +86 22 83955766

E-mail address: [yfany@163.com](mailto:yfany@163.com) (F.Y. Yan).

\*\* Corresponding author. E-mail address: [xaodayin@sohu.com](mailto:xaodayin@sohu.com) (X.G. Zhou).

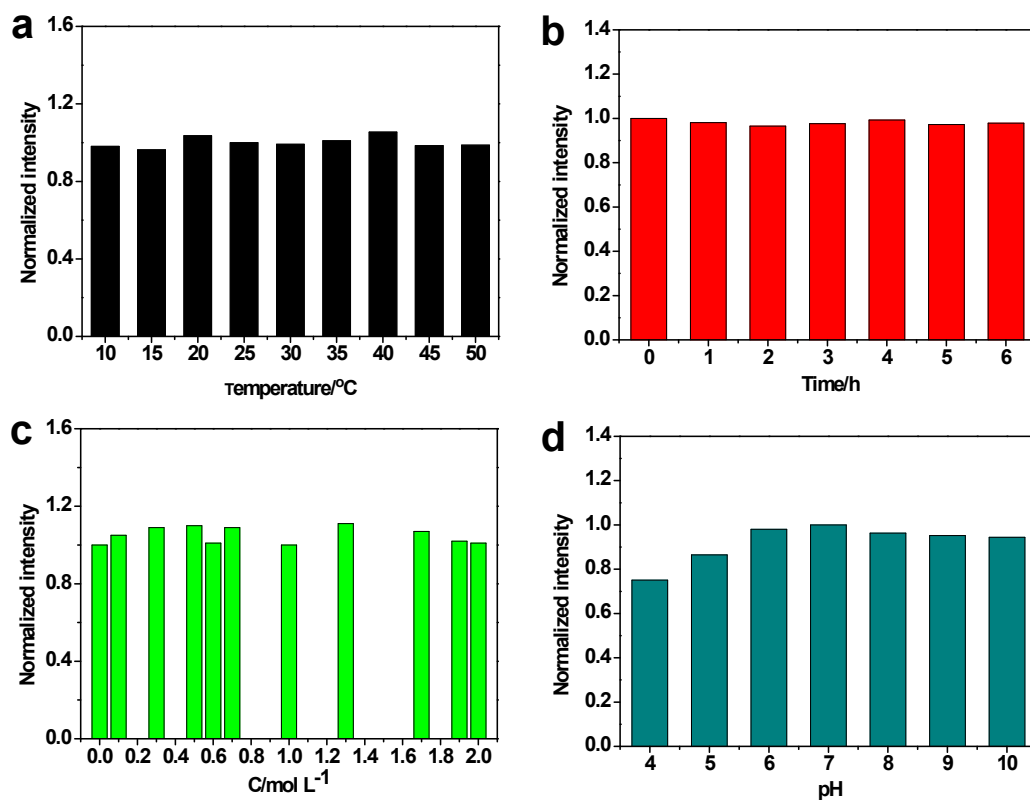

**Fig. S1.** Fluorescence intensity of CDs (0.05 mg mL<sup>-1</sup>) against: (a) temperature, (b) irradiation time, (c) ionic strength, (d) pH.

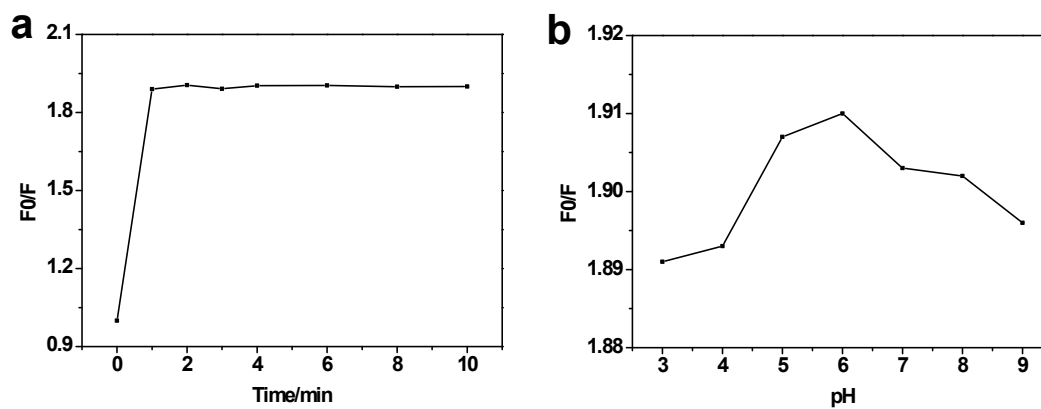

**Fig. S2.** (a) Time-dependent fluorescence response (0-10 min) of CDs (0.05 mg mL<sup>-1</sup>) in the presence of TNP (10 μM) in pH=7; (b) fluorescence response of CDs (0.05 mg mL<sup>-1</sup>) in the presence of TNP (10 μM) at different pH values.

## Quantum Yield of CDs

The fluorescence quantum yield was determined by slope method with quinine sulfate as standard: compared the integrated fluorescence intensity ( $\lambda_{\text{ex}}=310$  nm) and the absorbance value [several values gave the curve] of the CDs samples with that of the references. Then used the equation:

$$\phi_x = \phi_{\text{st}}(K_x/K_{\text{st}})(\eta_x/\eta_{\text{st}})^2$$

Where  $\phi$  is the quantum yield,  $K$  is the slope determined by the curves and  $\eta$  is the refractive index. The subscript “st” refers to quinine sulfate and “x” refers to the CDs.

For these aqueous solutions,  $\eta_x/\eta_{\text{st}}=1$ . So the equation was simplified to:

$$\phi_x = \phi_{\text{st}}(K_x/K_{\text{st}})$$

The results were shown in Table S1.

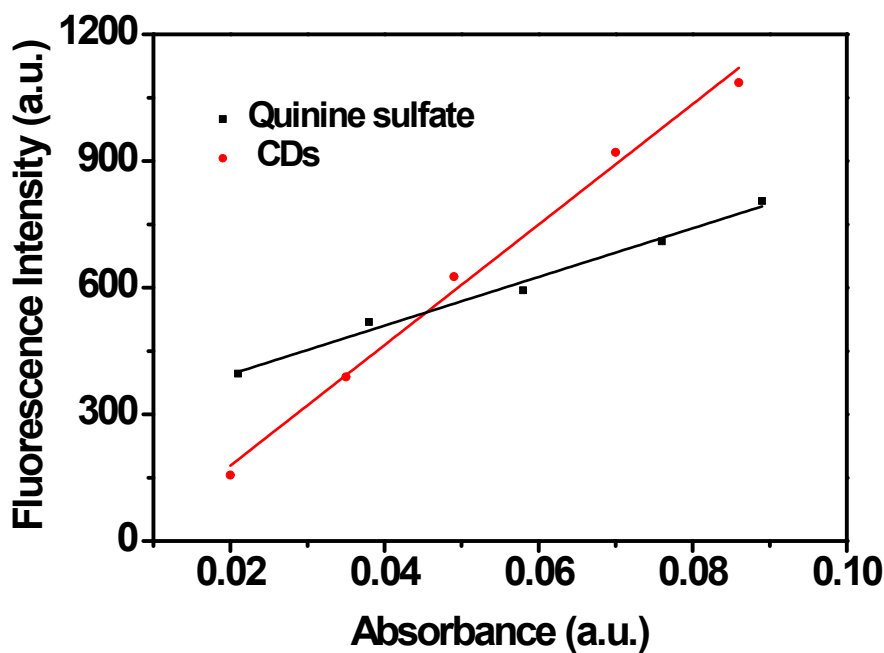

**Fig. S3.** The fluorescence intensity ( $\lambda_{\text{ex}}=310$  nm) of CDs and quinine sulfate as a function of the absorbance at 310 nm.

**Table S1**

Quantum yield of CDs.

| Serial     | Quinine sulfate | CDs      |
|------------|-----------------|----------|
| K          | 14269.486       | 5760.646 |
| $\phi$ (%) | 54              | 21.8     |

**Bacterial growth and labelling**

The bacteria used in this study were *Escherichia coli* MG1655 wild type. The bacteria were grown aerobically at 37 °C in a sterilized solid LB medium composed of 13.5% yeast extract, 27% peptone, 27% NaCl, and 32.5% agar at pH 7.4. After overnight growth, a colony from bacterial strain was placed into 10 mL falcon tubes and centrifuged for 20 min at 2300 rcf, washed twice with the sterilized PBS (pH 7.4). Under gentle vortexing, the bacteria pellet was re-suspended in 5 mL solution of CDs (1 mg mL<sup>-1</sup>) dissolved in PBS buffer. The resulting suspensions were kept at 37 °C for 2 h with gentle shaking. Bacteria pellet was washed with PBS buffer three times to remove all unbound CDs. Finally, the bacteria pellets was resuspended in PBS and transferred separately into 96-well microtiter plates and subjected to fluorescence study. Fluorescence microscopy experiments were carried out on an Olympus IX71 inverted fluorescence microscope with a 20× objective lens.

**Experimental details for cell imaging experiments**

NIH-3T3 cells were cultured in (Invitrogen) supplemented with 10% Fetal

Bovine Serum (FBS, Invitrogen) in an atmosphere of 5% CO<sub>2</sub> at 37 °C. One day before imaging, cells were placed in 6-well flat-bottomed plates. The culture medium was replaced by 2.5 mL fresh medium containing 0.01 mg·mL<sup>-1</sup> CDs and the cells were incubated for another 24 h. After being washed with fresh 1×PBS (pH = 7.0) three times, the cells were imaged on the inverted fluorescence microscope. Then, the cells were exposed to 10 μM TNP for 30 min. The cells were imaged after washing the culture medium three times with PBS.
